# Supplementary material for: Establishment and assessment of mortality risk prediction model in patients with sepsis based on early-stage peripheral lymphocyte subsets
Source: publisher site journal article supplement (doi:10.18632/aging.205772), 2024-04-25
Supplement: Supplementary file [file aging-v16i8-205772-supplementary-material-SD1.pdf]

## SUPPLEMENTARY TABLE

Supplementary Table 1. Univariate logistic regression for 28-day mortality in patients with sepsis.

| Variable                           | Beta   | SE    | Wald   | P                | OR   | 95% CI |      |
|------------------------------------|--------|-------|--------|------------------|------|--------|------|
| Sex                                | 0.346  | 0.230 | 2.262  | 0.133            | 1.41 | 0.90   | 2.22 |
| Age                                | 0.001  | 0.006 | 0.065  | 0.800            | 1.00 | 0.99   | 1.01 |
| Body mass index                    | 0.019  | 0.017 | 1.343  | 0.247            | 1.02 | 0.99   | 1.05 |
| Pulmonary                          | 0.047  | 0.217 | 0.047  | 0.828            | 1.05 | 0.69   | 1.60 |
| Cardiovascular                     | 0.346  | 0.232 | 2.221  | 0.136            | 1.41 | 0.90   | 2.23 |
| Infectious diseases                | -0.300 | 0.264 | 1.288  | 0.257            | 0.74 | 0.44   | 1.24 |
| Polytrauma                         | 0.463  | 0.319 | 2.101  | 0.147            | 1.59 | 0.85   | 2.97 |
| Gastrointestinal bleeding          | 0.127  | 0.407 | 0.098  | 0.754            | 1.14 | 0.51   | 2.52 |
| White blood cells                  | -0.060 | 0.036 | 2.666  | 0.103            | 0.94 | 0.88   | 1.01 |
| Red blood cells                    | -0.153 | 0.082 | 3.507  | 0.061            | 0.86 | 0.73   | 1.01 |
| Hemoglobin                         | -0.397 | 0.173 | 5.276  | <b>0.022</b>     | 0.67 | 0.48   | 0.94 |
| Red cell distribution width        | 0.680  | 0.120 | 32.008 | <b>&lt;0.001</b> | 1.97 | 1.56   | 2.50 |
| Platelets                          | -0.009 | 0.004 | 5.712  | <b>0.017</b>     | 0.99 | 0.98   | 1.00 |
| Neutrophil                         | 0.060  | 0.020 | 9.188  | <b>0.002</b>     | 1.06 | 1.02   | 1.10 |
| Blood glucose                      | 0.018  | 0.006 | 10.249 | <b>0.001</b>     | 1.02 | 1.01   | 1.03 |
| Blood urea nitrogen                | 0.020  | 0.015 | 1.807  | 0.179            | 1.02 | 0.99   | 1.05 |
| Creatinine                         | 0.007  | 0.003 | 4.937  | <b>0.026</b>     | 1.01 | 1.00   | 1.01 |
| Uric acid                          | 0.002  | 0.002 | 1.832  | 0.176            | 1.00 | 1.00   | 1.01 |
| Total bilirubin                    | 0.899  | 0.329 | 7.476  | <b>0.006</b>     | 2.46 | 1.29   | 4.68 |
| Direct bilirubin                   | 0.331  | 0.193 | 2.945  | 0.086            | 1.39 | 0.95   | 2.03 |
| Albumin                            | 0.798  | 0.347 | 5.297  | <b>0.021</b>     | 2.22 | 1.13   | 4.38 |
| Lactate                            | 0.733  | 0.278 | 6.929  | <b>0.009</b>     | 2.08 | 1.21   | 3.59 |
| Serum sodium                       | 0.023  | 0.028 | 0.706  | 0.401            | 1.02 | 0.97   | 1.08 |
| Serum potassium                    | 0.541  | 0.329 | 2.704  | <b>0.100</b>     | 1.72 | 0.90   | 3.27 |
| Serum phosphorus                   | 0.955  | 0.223 | 18.359 | <b>&lt;0.001</b> | 2.60 | 1.68   | 4.02 |
| SOFA                               | -0.006 | 0.059 | 0.010  | 0.920            | 0.99 | 0.89   | 1.12 |
| SOFA3                              | 0.233  | 0.071 | 10.705 | 0.001            | 1.26 | 1.10   | 1.45 |
| SOFA7                              | 0.267  | 0.062 | 18.757 | <b>&lt;0.001</b> | 1.31 | 1.16   | 1.47 |
| Hypertension                       | 0.184  | 0.231 | 0.632  | 0.427            | 1.20 | 0.76   | 1.89 |
| Diabetic mellitus                  | 0.351  | 0.223 | 2.493  | 0.114            | 1.42 | 0.92   | 2.20 |
| Infection                          | 0.288  | 0.272 | 1.121  | 0.290            | 1.33 | 0.78   | 2.27 |
| Chronic renal failure              | 0.035  | 0.262 | 0.018  | 0.895            | 1.04 | 0.62   | 1.73 |
| Respiratory disease                | 0.124  | 0.223 | 0.307  | 0.580            | 1.13 | 0.73   | 1.75 |
| <b>Organ dysfunction</b>           |        |       |        |                  |      |        |      |
| Kidney                             | 0.506  | 0.218 | 5.412  | <b>0.020</b>     | 1.66 | 1.08   | 2.54 |
| Liver                              | 0.743  | 0.273 | 7.395  | <b>0.007</b>     | 2.10 | 1.23   | 3.59 |
| Heart                              | 0.131  | 0.219 | 0.358  | 0.550            | 1.14 | 0.74   | 1.75 |
| Lung                               | 0.127  | 0.362 | 0.124  | 0.725            | 1.14 | 0.56   | 2.31 |
| Shock                              | 1.570  | 0.230 | 46.444 | <b>&lt;0.001</b> | 4.80 | 3.06   | 7.55 |
| <b>Lymphocyte subsets at day 1</b> |        |       |        |                  |      |        |      |
| Lymphocytes                        | 0.000  | 0.001 | 0.041  | 0.841            | 1.00 | 1.00   | 1.00 |
| CD3 <sup>+</sup> T cells           | -0.009 | 0.008 | 1.090  | 0.297            | 0.99 | 0.98   | 1.01 |
| CD4 <sup>+</sup> T cells           | -0.002 | 0.001 | 1.867  | 0.172            | 1.00 | 1.00   | 1.00 |
| CD8 <sup>+</sup> T cells           | -0.002 | 0.002 | 0.417  | 0.518            | 1.00 | 0.99   | 1.00 |

|                                    |        |       |        |                  |      |      |      |
|------------------------------------|--------|-------|--------|------------------|------|------|------|
| CD19 <sup>+</sup> T cells          | 0.002  | 0.003 | 0.275  | 0.600            | 1.00 | 1.00 | 1.01 |
| NK cells                           | -0.001 | 0.003 | 0.109  | 0.741            | 1.00 | 0.99 | 1.00 |
| <b>Lymphocyte subsets at day 3</b> |        |       |        |                  |      |      |      |
| Lymphocytes                        | -0.006 | 0.001 | 25.523 | <b>&lt;0.001</b> | 0.99 | 0.99 | 1.00 |
| CD3 <sup>+</sup> T cells           | -0.186 | 0.020 | 89.150 | <b>&lt;0.001</b> | 0.83 | 0.80 | 0.86 |
| CD4 <sup>+</sup> T cells           | -0.004 | 0.001 | 18.456 | <b>&lt;0.001</b> | 1.00 | 0.99 | 1.00 |
| CD8 <sup>+</sup> T cells           | -0.006 | 0.004 | 2.266  | 0.132            | 0.99 | 0.99 | 1.00 |
| CD19 <sup>+</sup> B cells          | -0.001 | 0.002 | 0.155  | 0.694            | 1.00 | 1.00 | 1.00 |
| NK cells                           | -0.032 | 0.004 | 53.369 | <b>&lt;0.001</b> | 0.97 | 0.96 | 0.98 |
